# Supplementary material for: Fast turnover of genome transcription across evolutionary time exposes entire non-coding DNA to de novo gene emergence
Source: eLife journal article supplement (doi:10.7554/elife.09977), 2016-02-02
Supplement: supp [file elife-09977-supp-v1.zip]

Archive with 7 entries (7 files):
- elife_poa_e09977_Figure_1_figure_supplement_2.pdf
- elife_poa_e09977_Figure_4_figure_supplement_1.pdf
- elife_poa_e09977_Figure_3_figure_supplement_1.pdf
- elife_poa_e09977_Figure_3_figure_supplement_2.pdf
- elife_poa_e09977_Figure_1_figure_supplement_1.pdf
- elife_poa_e09977_Figure_4_figure_supplement_2.pdf
- elife_poa_e09977_Figure_4_figure_supplemnt_3.pdf
