# Supplementary material for: Fast turnover of genome transcription across evolutionary time exposes entire non-coding DNA to de novo gene emergence
Source: eLife journal article supplement (doi:10.7554/elife.09977), 2016-02-02
Supplement: supp [file elife-09977-supp-v1.zip › elife_poa_e09977_Figure_1_figure_supplement_2.pdf]

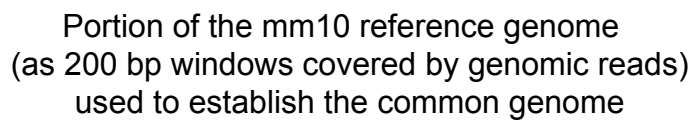

Portion of the mm10 reference genome  
(as 200 bp windows covered by genomic reads)  
used to establish the common genome
