# Supplementary figures and images for: Fast turnover of genome transcription across evolutionary time exposes entire non-coding DNA to de novo gene emergence
Source: eLife journal article supplement (doi:10.7554/elife.09977), 2016-02-02

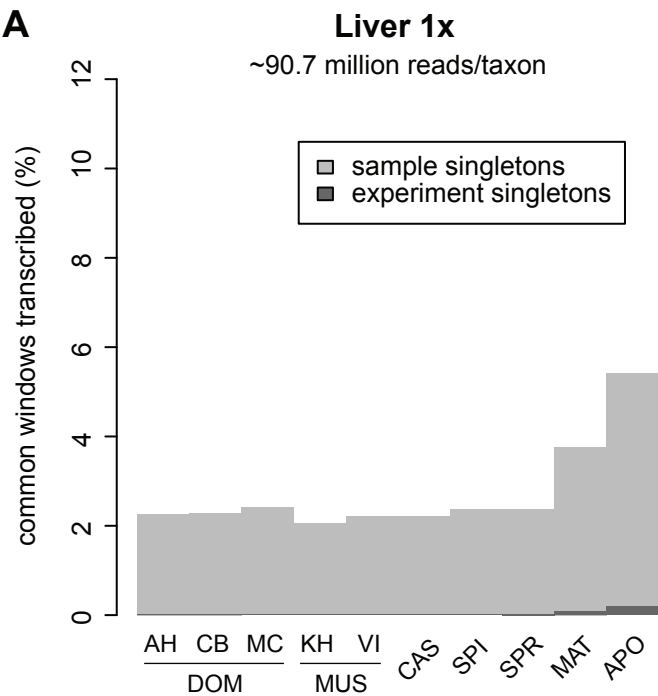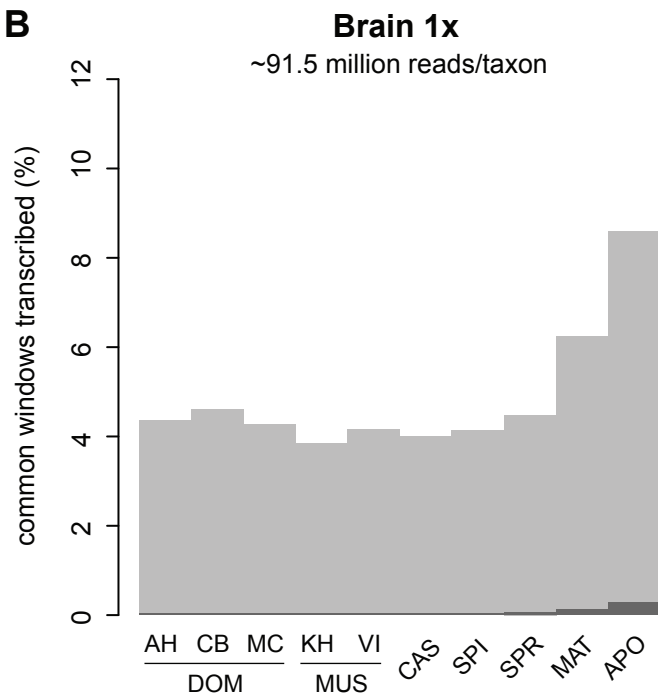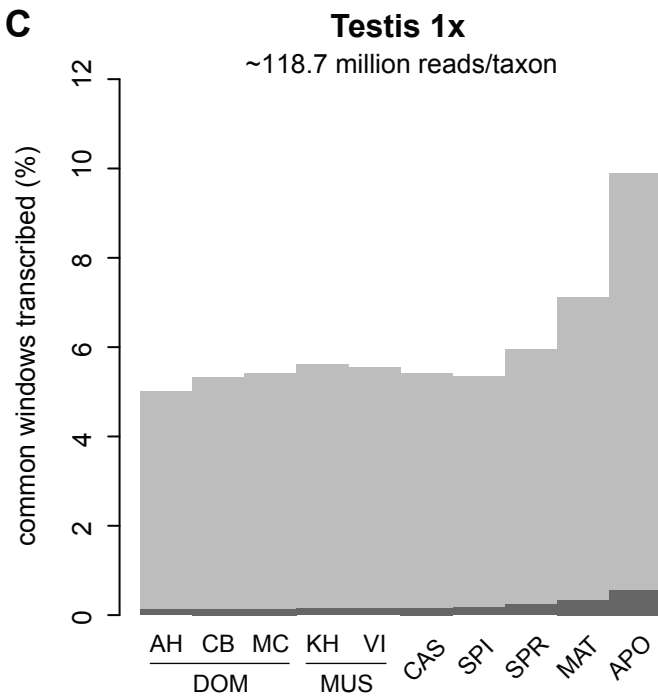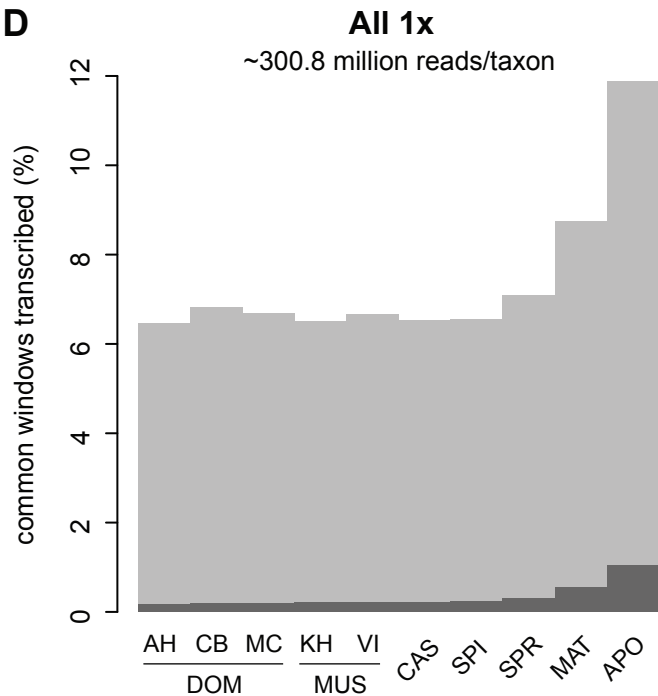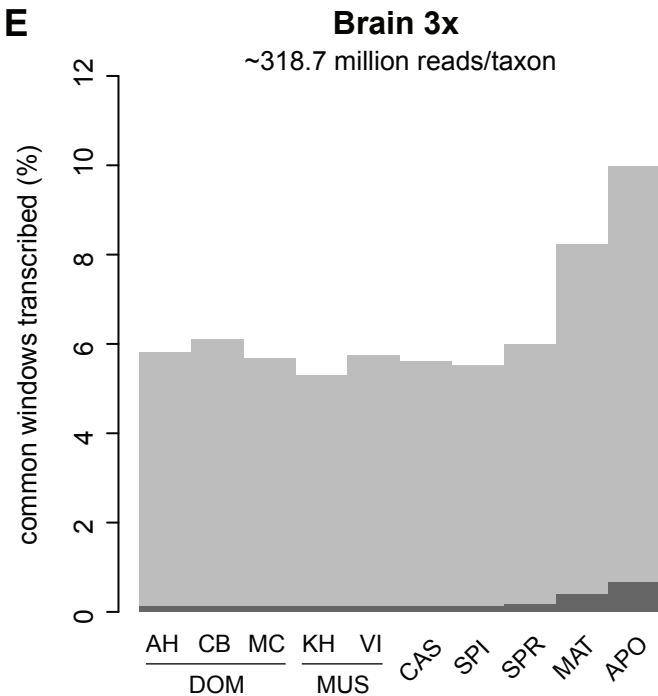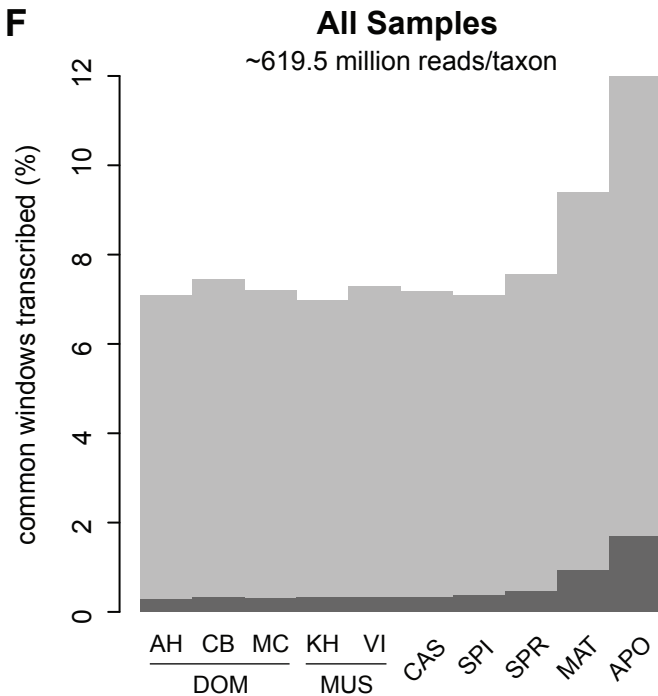

Supplement: supp [file elife-09977-supp-v1.zip › elife_poa_e09977_Figure_4_figure_supplement_1.pdf]

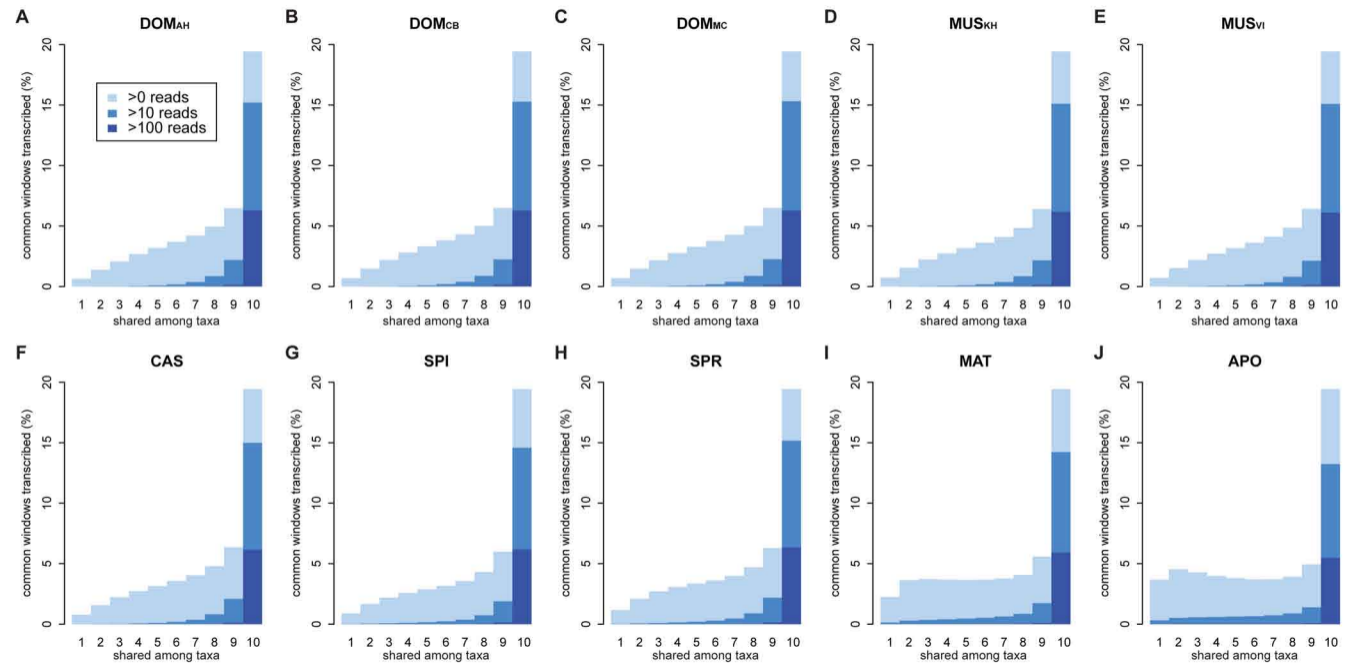

Supplement: supp [file elife-09977-supp-v1.zip › elife_poa_e09977_Figure_3_figure_supplement_1.pdf]

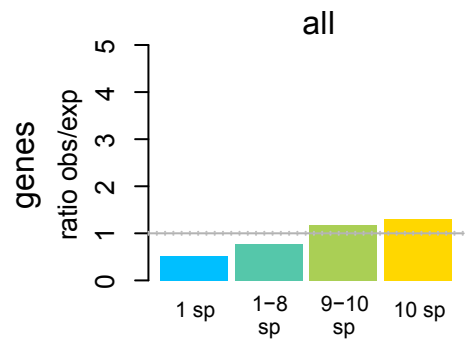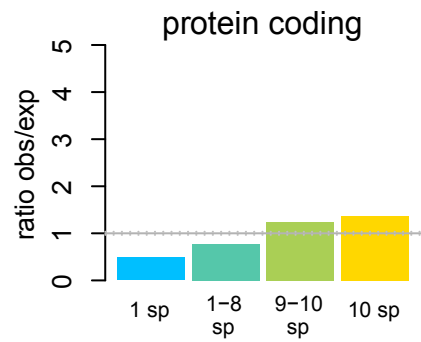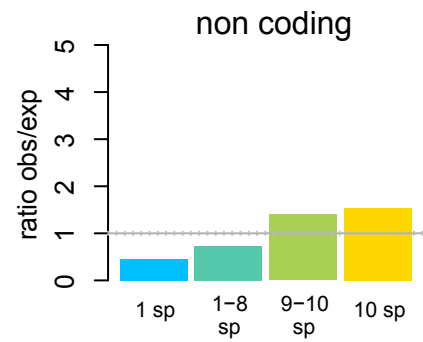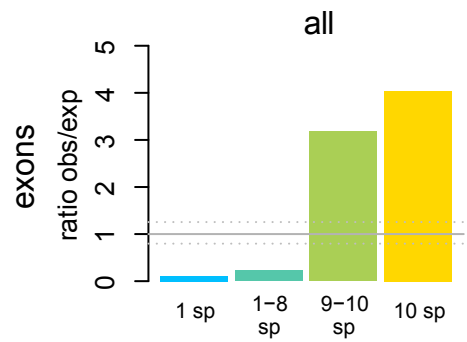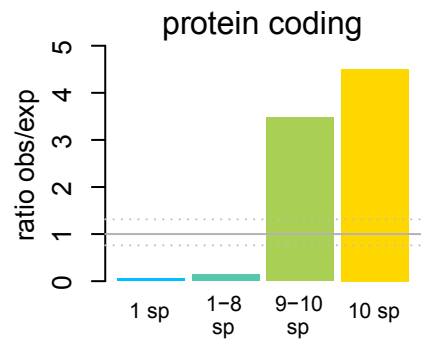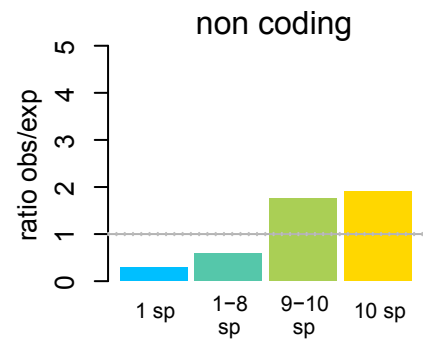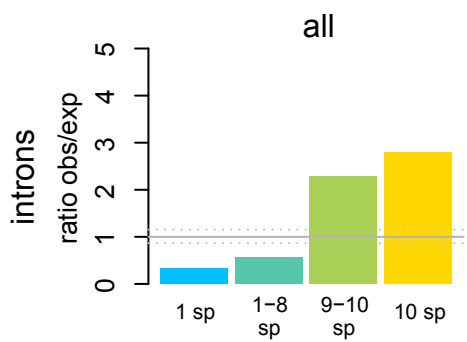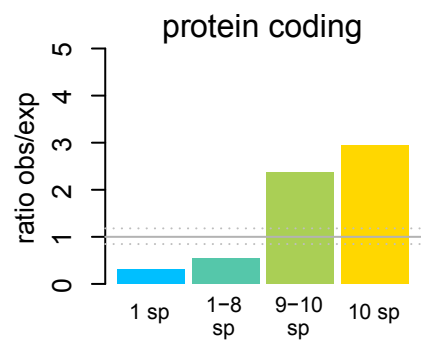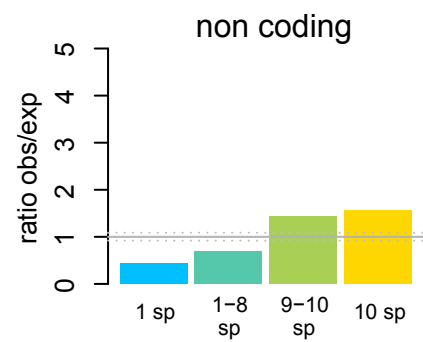

Supplement: supp [file elife-09977-supp-v1.zip › elife_poa_e09977_Figure_3_figure_supplement_2.pdf]

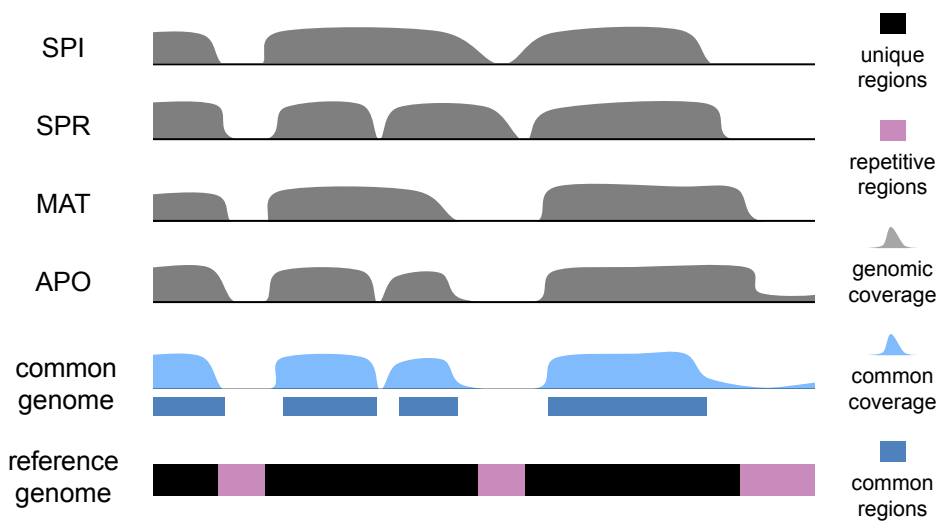

Supplement: supp [file elife-09977-supp-v1.zip › elife_poa_e09977_Figure_1_figure_supplement_1.pdf]

# singleton coverage

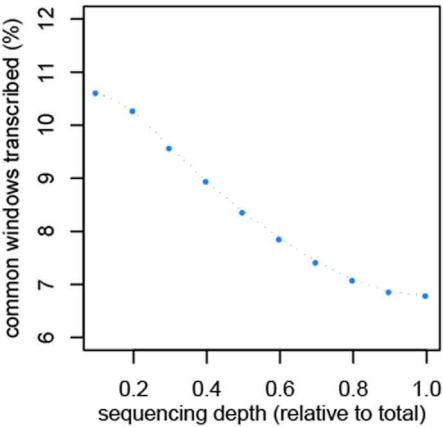

Supplement: supp [file elife-09977-supp-v1.zip › elife_poa_e09977_Figure_4_figure_supplement_2.pdf]

Only 1 read  
(88.1%)

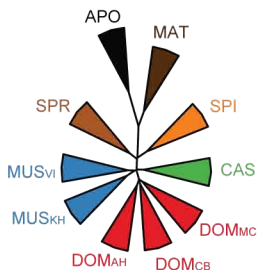

—0.5

Between  
1 and 5 reads  
(52.2%)

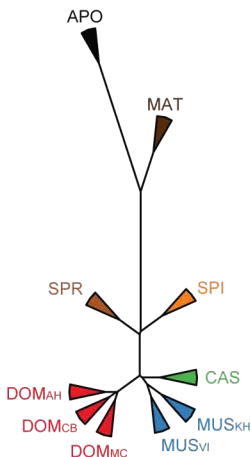

—0.5

All reads  
(35.2%)

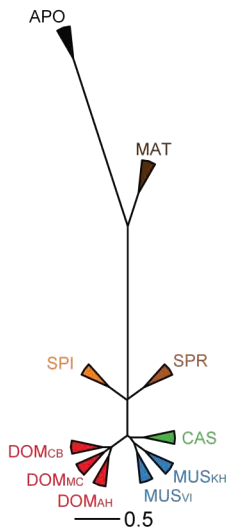

—0.5

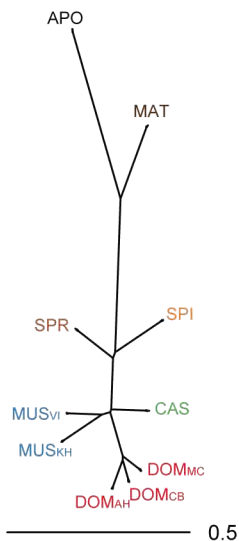

0.5

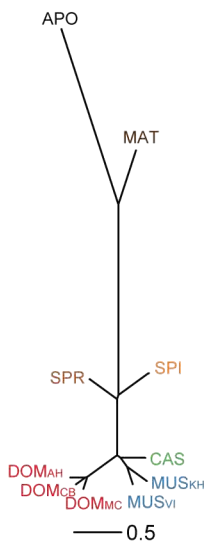

—0.5

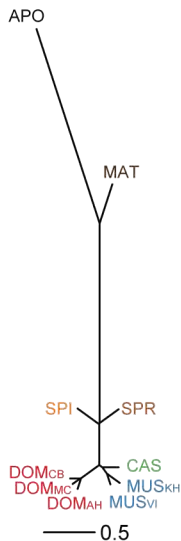

—0.5

Only 1 read  
(88.1%)

Between  
1 and 5 reads  
(52.2%)

All reads  
(35.2%)

Supplement: supp [file elife-09977-supp-v1.zip › elife_poa_e09977_Figure_4_figure_supplemnt_3.pdf]
